# Supplementary material for: Genome-wide identification of target genes for miR-204 and miR-211 identifies their proliferation stimulatory role in breast cancer cells
Source: PubMed Central journal article supplement (PMC4848534; doi:10.1038/srep25287), 2016-04-28

**Genome-wide identification of target genes for miR-204  
and miR-211 identifies their proliferation stimulatory role  
in breast cancer cells**

Hyunkyung Lee<sup>1,†</sup>, Seungyeon Lee<sup>1,†</sup>, Hansol Bae<sup>1</sup>, Han-Sung Kang<sup>2</sup>, and Sun Jung Kim<sup>1</sup>

<sup>1</sup>Department of Life Science, Dongguk University-Seoul, Goyang, Republic of Korea

<sup>2</sup>Research Institute and Hospital, National Cancer Center, Goyang, Republic of Korea

**Supporting Information**

**Table S1. Potential target genes of miR-204/211\***

| Gene symbol | Accession      | Description                                                      | Fold change |         |
|-------------|----------------|------------------------------------------------------------------|-------------|---------|
|             |                |                                                                  | miR-204     | miR-211 |
| IFIT2       | NM_001547.4    | Interferon-Induced Protein With Tetratricopeptide Repeats 2      | -26.2       | -33.9   |
| MX1         | NM_002462.2    | MX Dynamin-Like GTPase 1                                         | -14.7       | -21.6   |
| SAMD9       | NM_017654.2    | Sterile Alpha Motif Domain Containing 9                          | -13.7       | -17.5   |
| LAMP3       | NM_014398.2    | Lysosomal-Associated Membrane Protein 3                          | -9.1        | -10.4   |
| DDX60L      | NM_001012967.1 | DEAD (Asp-Glu-Ala-Asp) Box Polypeptide 60-Like                   | -7.1        | -7.3    |
| IFI44       | NM_006417.3    | Interferon-Induced Protein 44                                    | -7.0        | -5.2    |
| TRANK1      | NM_014831.1    | TPR and ankyrin repeat-containing protein 1                      | -5.8        | -5.6    |
| SP100       | NM_001080391.1 | SP100 Nuclear Antigen                                            | -3.4        | -3.8    |
| NCOA7       | NM_181782.2    | Nuclear Receptor Coactivator 7                                   | -3.1        | -2.6    |
| TRIM38      | NM_006355.2    | Tripartite Motif Containing 38                                   | -2.8        | -2.7    |
| IFIT5       | NM_012420.1    | Interferon-Induced Protein With Tetratricopeptide Repeats 5      | -2.4        | -2.3    |
| PML         | XM_942288.1    | Promyelocytic Leukemia                                           | -2.2        | -2.3    |
| ADAR        | NM_001111.3    | Adenosine Deaminase, RNA-Specific                                | -2.1        | -2.2    |
| MOB3C       | NM_145279.4    | MOB kinase activator 3C                                          | -2.1        | -1.8    |
| ADAR        | NM_015840.2    | Adenosine Deaminase, RNA-Specific                                | -2.1        | -2.2    |
| SERP1       | NM_014445.3    | Stress-Associated Endoplasmic Reticulum Protein 1                | -1.9        | -1.5    |
| LAMP3       | NM_014398.2    | Lysosomal-Associated Membrane Protein 3                          | -1.9        | -1.9    |
| PSME1       | NM_176783.1    | Proteasome (Prosome, Macropain) Activator Subunit 1 (PA28 Alpha) | -1.8        | -1.6    |
| ZFYVE26     | NM_015346.2    | Zinc Finger, FYVE Domain Containing 26                           | -1.7        | -1.7    |
| GREB1       | NM_033090.2    | Growth Regulation By Estrogen In Breast Cancer 1                 | -1.7        | -1.6    |
| TXNIP       | NM_006472.2    | Thioredoxin Interacting Protein                                  | -1.5        | -2.0    |
| PSME1       | NM_006263.2    | Proteasome (Prosome, Macropain) Activator Subunit 1 (PA28 Alpha) | -1.5        | -1.5    |

\*Target genes were screened from expression array data ( $|\text{fold change}| \geq 1.5$ ) and six public databases (miRanda, miRWalk, PITA5, TargetScan, DIANAmt, and RNA22).

**Table S2. Sequence information for mimics, inhibitors, siRNAs, and control**

|                        |               | <b>Catalog no.</b> | <b>Product name or sequence (5'-3')</b>                          | <b>Supplier</b>      |
|------------------------|---------------|--------------------|------------------------------------------------------------------|----------------------|
| <b>primer</b>          | miR-204-5p    | MS00003773         | Hs_miR-204_1 miScript Primer Assay                               | Qiagen               |
|                        | miR-211-5p    | MS00003808         | Hs_miR-211_1 miScript Primer Assay                               | Qiagen               |
|                        | RNU6          | MS00033740         | Hs_RNU6-2_11 miScript Primer Assay                               | Qiagen               |
|                        | LOC285194     |                    | F: TGTGCCTGTTTGACCTCTGA<br>R: AGGAAGGATAAAAAGACCGACCA            | Genotech<br>Genotech |
| <b>miRNA mimic</b>     | miR-204-5p    |                    | UUCCCUUUGUCAUCCUAUGCCU                                           | Bioneer              |
|                        | miR-211-5p    |                    | UUCCCUUUGUCAUCCUUCGCCU                                           | Bioneer              |
| <b>miRNA inhibitor</b> | control miRNA | SMC-3001           | miRNA mimic Negative control #2                                  | Bioneer              |
|                        | miR-204-5p    |                    | AGGCAUAGGAUGACAAAGGGAA                                           | Bioneer              |
|                        | miR-211-5p    |                    | AGGCGAAGGAUGACAAAGGGAA                                           | Bioneer              |
| <b>siRNA</b>           | control       | SMC-2101           | miRNA inhibitor Negative control #1                              | Bioneer              |
|                        | LOC285194     |                    | Sense : GGCCAAACCCUCAUGAAUtt<br>Antisense: AUUCAUUGAGGGUUUGGCCtg | Bioneer              |
|                        | control       | SN-1003            | Negative control siRNA                                           | Bioneer              |

**Figure S1. Transfection of mimics and inhibitors for miR-204/211 into MCF-10A and MCF-7.** Mimics (A) and inhibitors (B) for each miR were transiently transfected into the indicated cell and expression was examined by real-time RT-PCR. NC: negative control mimic or inhibitor. All samples were performed at least three times and the result is shown as average with standard errors.

**A**

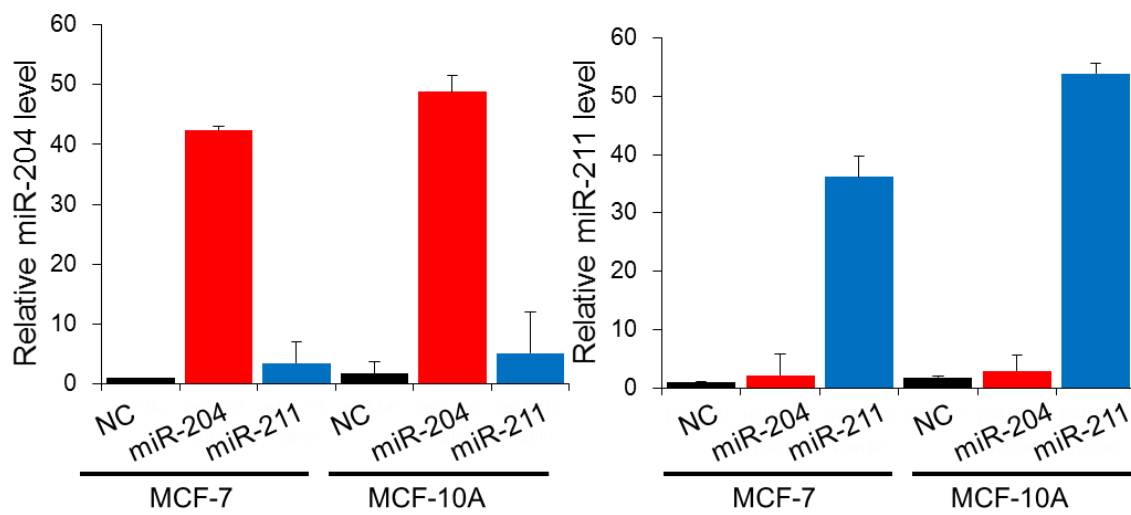

**B**

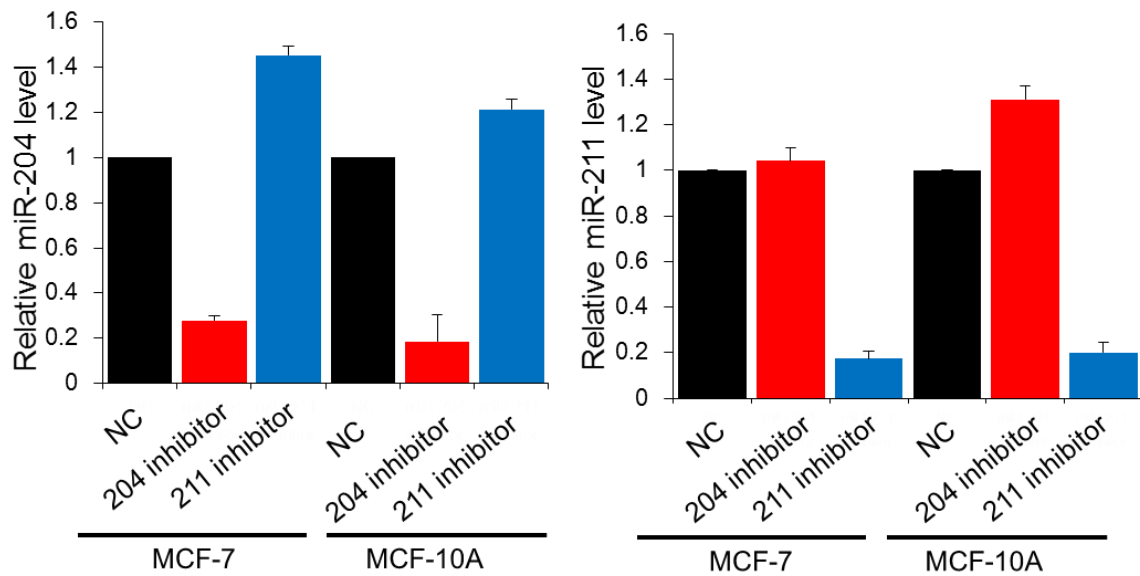

**Figure S2. Highest confidence network of genes displaying altered expression by miR-204/211 in MCF-10A.** The highest confidence network was constructed using IPA from 145 and 162 dysregulated genes by miR-204 (A) and miR-211 (B), respectively. The top network in MCF-10A for miR-204/211 was “Cancer, Cellular Movement, Organismal Injury, and Abnormalities.”

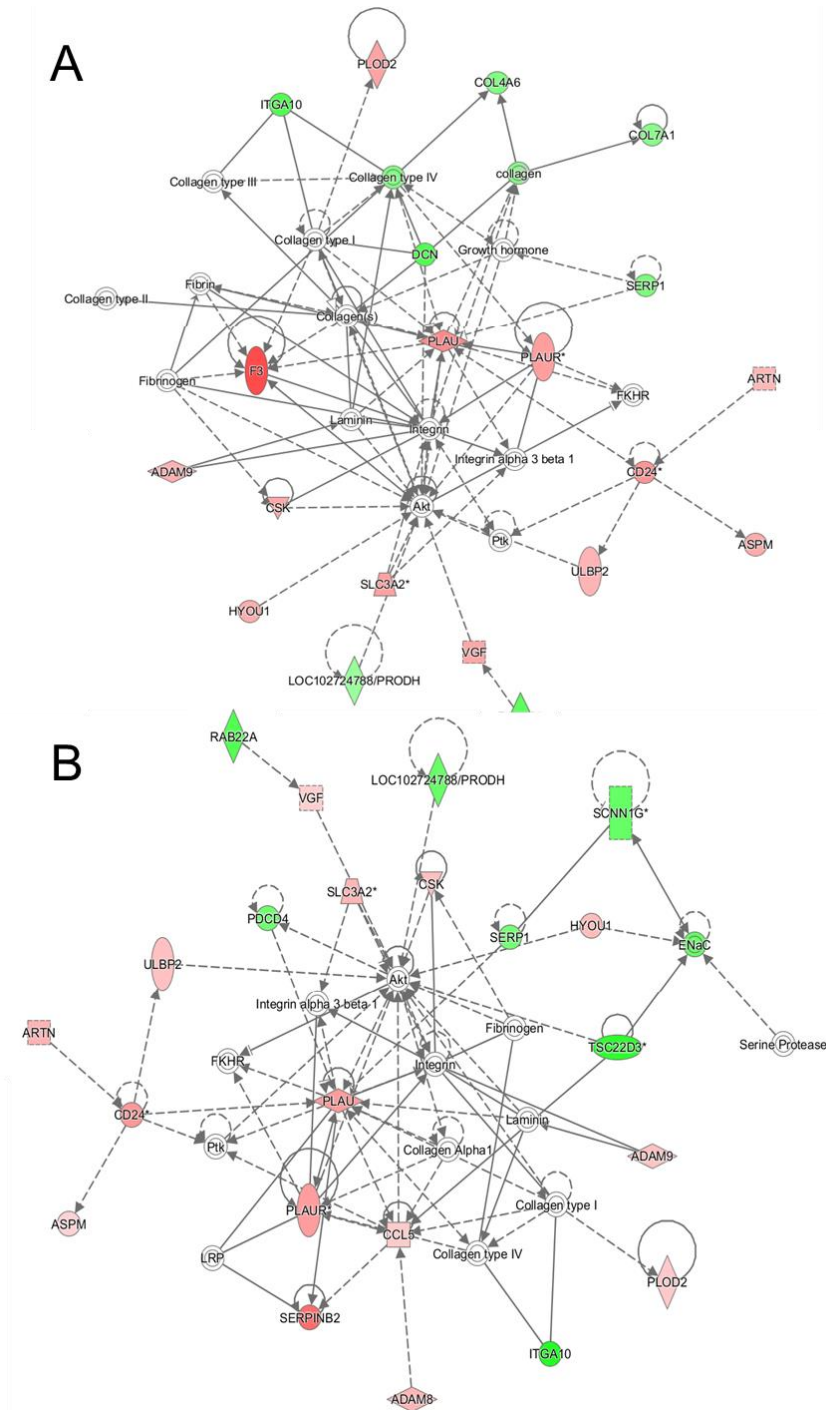

**Figure S3. Pathways most strongly associated with the genes significantly dysregulated by miR-204/211 in MCF-10A.** The top 10 functional categories are given for altered genes by miR-204 (A) and miR-211 (B) overexpressed in MCF-7 cells. In both miRs, “Regulation of cytokine production in macrophage and T helper cells” appeared as the top pathway having the lowest *p*-value.

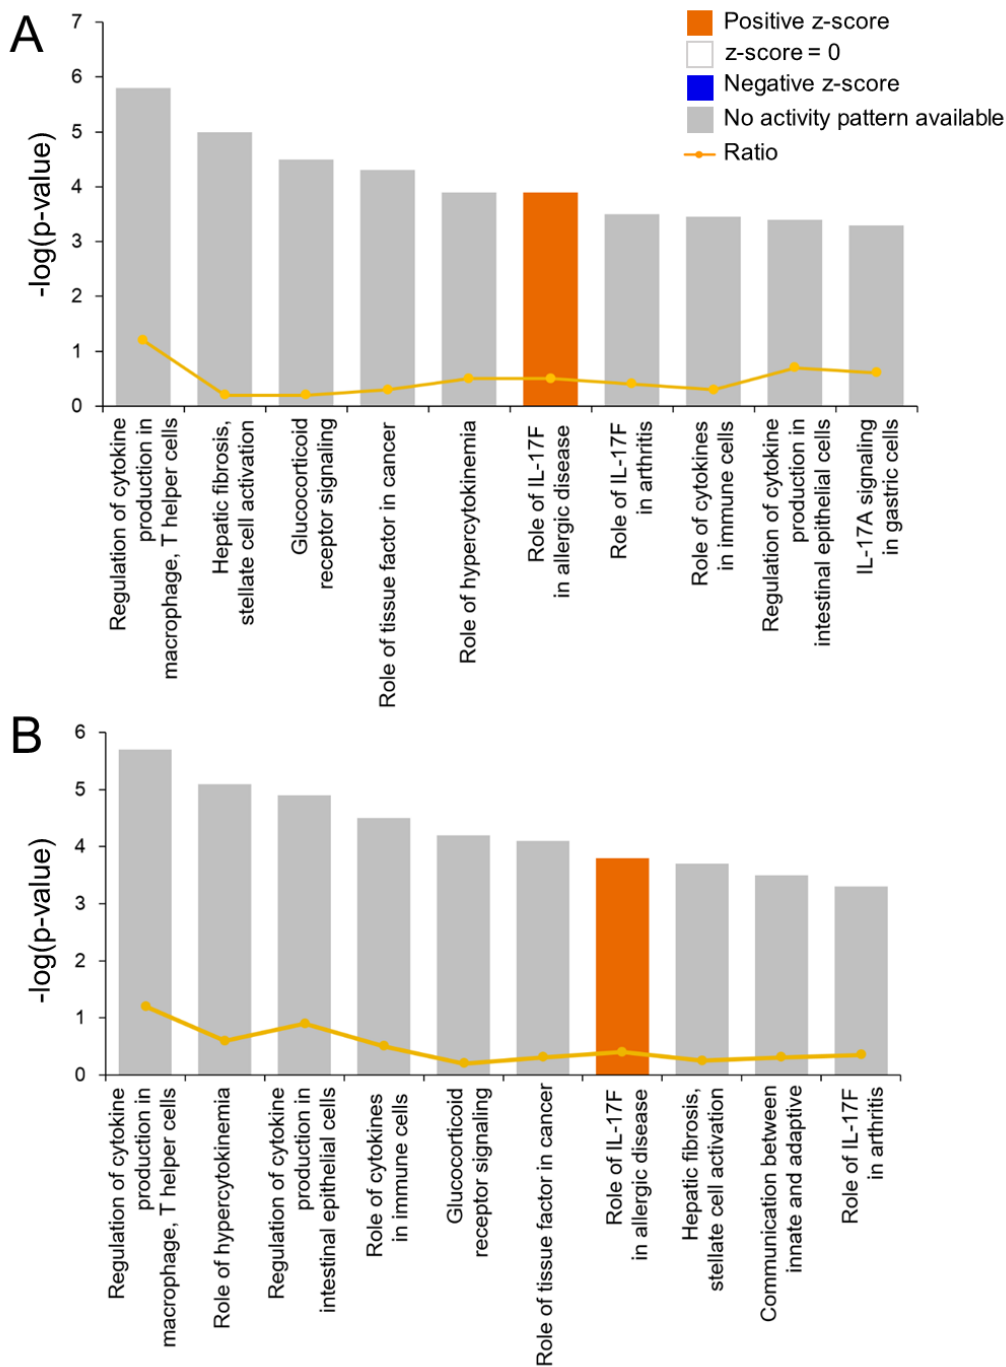

**Figure S4. miR-204/211 induce cell proliferation of MCF-10A.** Mimic miR or inhibitor miR of miR-204/211 was transiently transfected into MCF-10A to examine their effect on cell proliferation. After transfection, colony formation analysis (A) and CCK-8 assay (B) were performed. The colony images are taken from at least three independent experiments, and the cell proliferation is shown as means with standard errors.

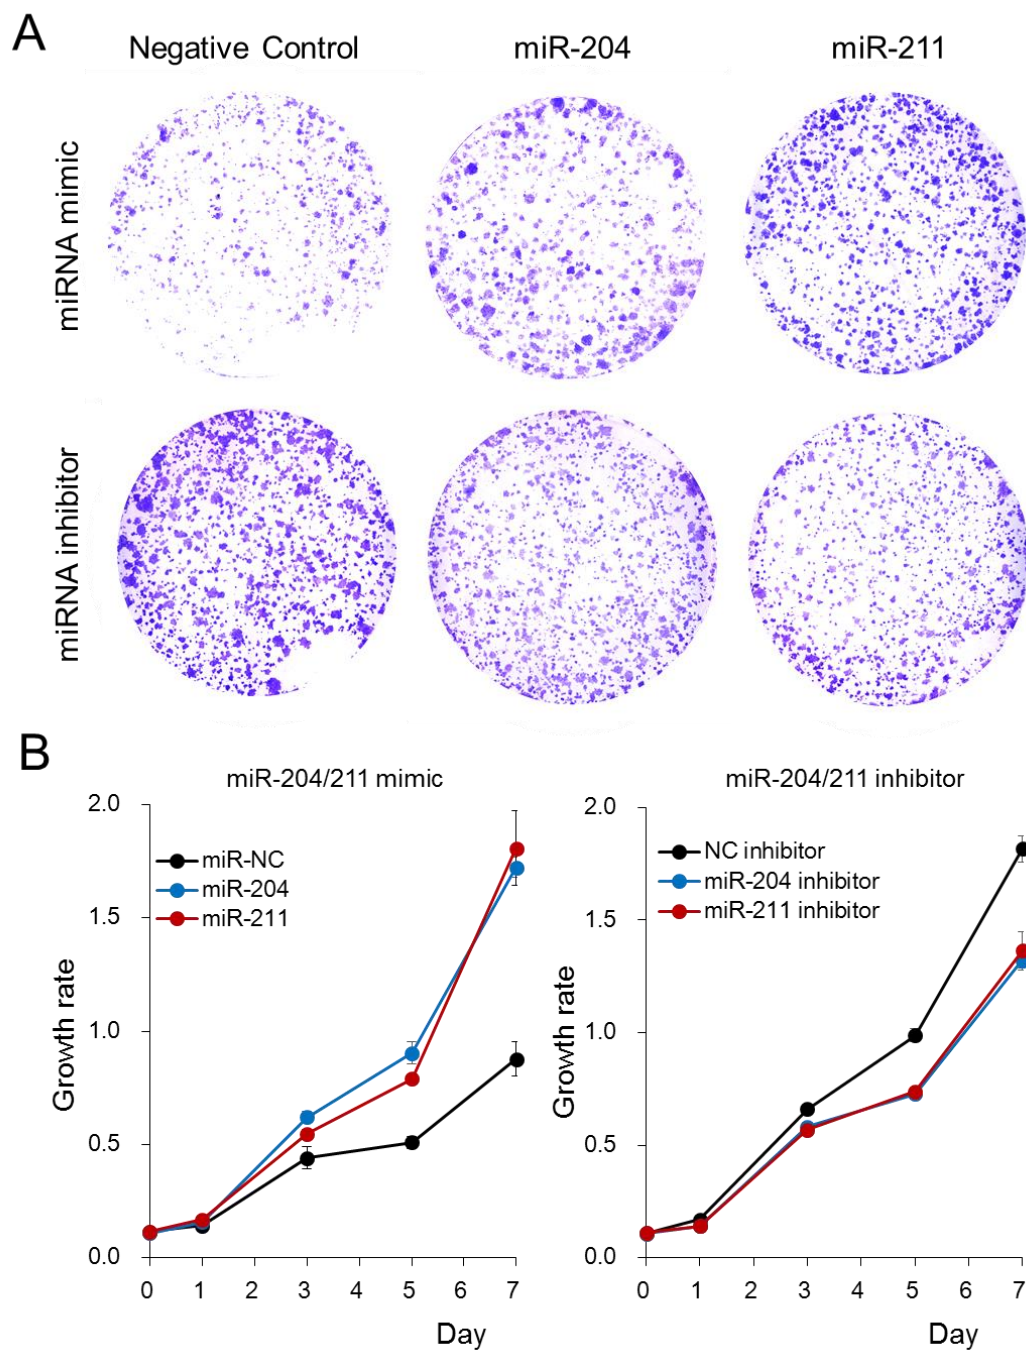

**Figure S5. Kaplan-Meier survival analysis of MX1 and TXNIP expression in the breast cancer patients.** Samples were stratified into tertiles based on MX1 and TXNIP expression level. The log-rank test was performed in tumor samples using distant metastasis-free survival (DMFS) as the endpoint. High MX1 (A) and TXNIP (B) expression is significantly associated with higher DMFS over time among HER2-enriched tumors (n=166) and all tumors (n = 1,379), respectively.

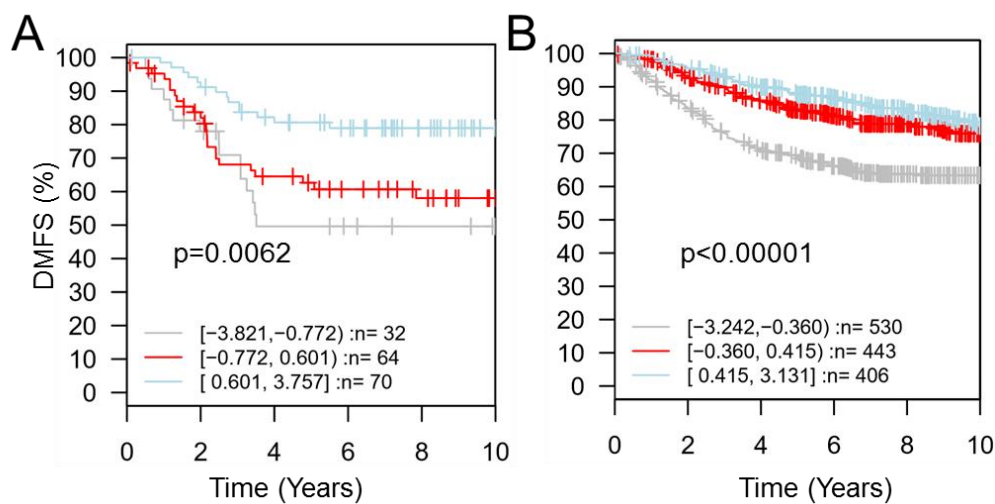

Supplement: srep25287-s1.pdf [file srep25287-s1.pdf]
